# Supplementary material
Source: publisher site journal article supplement (https://www.dovepress.com/get_supplementary_file.php?f=342259.docx)
Supplement: Supplementary file 1 [file get_supplementary_file.php]

Supplementary Table 1: Demographic and CBC parameters of male and female groups.

|  | Male  (n=64; 66.67%) | Female  (n=32; 33.33%) |  |
| --- | --- | --- | --- |
| Mean±SD | Mean±SD | P Value |
| Age | 61.22±16.15 | 61.31±12.88 | 0.98 |
| WBC (109/L) | 12.92±9.19 | 15.80±14.01 | 0.2295 |
| RBC (×1012/L) | 3.94±1.19 | 3.86±1.11 | 0.7432 |
| Hb (g/dl) | 10.27±3.09 | 10.06±2.93 | 0.7493 |
| HCT (%) | 32.56±9.34 | 31.75±8.51 | 0.6802 |
| MCV (fl) | 83.96±10.38 | 80.73±15.48 | 0.2281 |
| MCH (pg) | 26.49±3.24 | 26.34±3.52 | 0.8342 |
| MCHC (g/dl) | 31.47±2.36 | 31.46±2.25 | 0.9958 |
| RDW (%) | 17.02±3.10 | 17.88±3.35 | 0.2251 |
| Platelet (103/µL) | 212.08±132.88 | 189.03±131.11 | 0.4231 |
| MPV (fl) | 10.85±1.35 | 10.87±1.74 | 0.9657 |
| % N | 78.52±14.53 | 82.92±9.74 | 0.125 |
| % L | 12.75±10.31 | 11.10±8.27 | 0.431 |
| % M | 6.58±4.32 | 5.02±2.58 | 0.0622 |
| % E | 1.44±2.70 | 0.62±1.36 | 0.1112 |
| % B | 0.33±0.88 | 0.29±0.34 | 0.7875 |
| ANC (109/L) | 10.98±8.65 | 13.76±13.40 | 0.2266 |
| ALC (109/L) | 1.23±0.85 | 1.34±0.91 | 0.5669 |
| AMC (109/L) | 0.77±0.62 | 0.74±0.67 | 0.7910 |
| AEC(109/L) | 0.11±0.18 | 0.05±0.09 | 0.1109 |
| ABC(109/L) | 0.04±0.06 | 0.04±0.03 | 0.7418 |
| MPR | 6.74±7.88 | 9.58±12.97 | 0.2530 |
| NLR | 14.48±16.39 | 15.3±20.9 | 0.8317 |

Abbreviations: WBC = white blood cells; RBC = red blood cells; Hb = hemoglobin; HCT = hematocrit; MCV = mean cell volume; MCH = mean cell hemoglobin; MCHC = mean cell hemoglobin concentration; RDW = red blood cell distribution width; MPV = mean platelet volume; N = neutrophils; L = lymphocytes; M = monocytes; E = eosinophils; B = basophils; ANC = absolute neutrophil count; ALC = absolute lymphocyte count, AMC = absolute monocyte count; AEC = absolute eosinophil count, EBC = absolute basophil count; MPR = mean platelet ratio; NLR =neutrophil to lymphocyte ratio.

Supplementary Table 2: Coagulation profile and D-dimer results of male and female groups.

| Parameters | Male | Female | P Value |
| --- | --- | --- | --- |
| Mean±SD | Mean±SD |
| PT seconds | 15.0±4.3 | 15.36±5.4 | 0.7128 |
| aPTT seconds | 34.4±8.62 | 39.34±24.97 | 0.1698 |
| D-dimer µg/ml | 5.5±6.9 | 5.3±7.9 | 0.9265 |
